# Supplementary material
Source: publisher site journal article supplement (https://www.dovepress.com/article/350167)
Supplement: Supplementary file 1 [file get_supplementary_file.php]

**A pooled analysis of mortality in patients with COPD** **receiving dual bronchodilation with and without additional inhaled corticosteroid: Supplemental material**

Marc Miravitlles,1 Katia Verhamme,2 Peter M.A. Calverley,3 Michael Dreher,4 Valentina Bayer,5 Asparuh Gardev,6 Alberto de la Hoz,6 Jadwiga Wedzicha,7 David Price8,9

1Pneumology Department, Hospital Universitari Vall d’Hebron, Vall d’Hebron Research Institute (VHIR), Vall d’Hebron Barcelona Hospital Campus. CIBER de Enfermedades Respiratorias (CIBERES) Barcelona, Spain; 2Department of Medical Informatics, Erasmus MC, Rotterdam, The Netherlands; 3Clinical Science Centre, Institute of Ageing and Chronic Disease, University of Liverpool, Liverpool, UK; 4Department of Pneumology and Intensive Care Medicine, University Hospital Aachen, Aachen, Germany; 5Boehringer Ingelheim Pharmaceuticals, Inc., Ridgefield, CT, USA; 6Boehringer Ingelheim International GmbH, Ingelheim am Rhein, Germany; 7Head Respiratory Division, National Heart and Lung Institute, Imperial College London, London, UK; 8Observational and Pragmatic Research Institute, Singapore; 9Centre of Academic Primary Care, Division of Applied Health Sciences, University of Aberdeen, Aberdeen, United Kingdom

**e-Table 1. Proportion of patients that discontinued trial medication within the 52 weeks**

|  | **LAMA/LABA**  **n=3,133** | **LAMA/LABA/ICS**  **n=3,133** |
| --- | --- | --- |
| **Prematurely discontinued trial medication, n (%)** | 380 (12.1) | 409 (13.1) |
| Adverse event  Worsening of COPD  Worsening of other pre-existing diseases  Other adverse event | 195 (6.2)  63 (2.0)  23 (0.7)  109 (3.5) | 183 (5.8)  70 (2.2)  12 (0.4)  101 (3.2) |
| Lack of efficacy | 18 (0.6) | 13 (0.4) |
| Non-compliance with protocol | 22 (0.7) | 33 (1.1) |
| Lost to follow-up | 13 (0.4) | 7 (0.2) |
| Refused continuation of medicine | 55 (1.8) | 101 (3.2) |
| Consent withdrawn not due to adverse event | 55 (1.8) | 36 (1.1) |
| Other | 22 (0.7) | 36 (1.1) |

COPD, chronic obstructive pulmonary disease; ICS, inhaled corticosteroid; LABA, long-acting β2-agonist; LAMA, long-acting muscarinic antagonist.

**e-Table 2. Adjudicated cause of death for patients who died in the mortality analysis (on-treatment and on- and off-treatment)**

| **Adjudicated cause of deatha, n (%)** | **LAMA/LABA**  **N=3,133** | **LAMA/LABA/ICS**  **N=3,133** |
| --- | --- | --- |
| Total deaths on-treatment | 41 (1.3) | 45 (1.4) |
| Cardiac | 2 (0.1) | 2 (0.1) |
| Respiratory | 9 (0.3) | 11 (0.4) |
| Cancer | 6 (0.2) | 8 (0.3) |
| Other | 24 (0.8) | 25 (0.8) |
|  |  |  |
| Total deaths on- and off-treatment | 74 (2.4) | 66 (2.1) |
| Cardiac | 5 (0.2) | 4 (0.1) |
| Respiratory | 18 (0.6) | 19 (0.6) |
| Cancer | 16 (0.5) | 14 (0.4) |
| Other | 35 (1.1) | 30 (1.0) |

aAdjudicated cause of death was based on the primary SOC. The WISDOM study used investigator-reported deaths. One patient in the triple therapy arm had two causes of death (respiratory and other) and both are counted.

ICS, inhaled corticosteroid; LABA, long-acting β2‑agonist; LAMA, long-acting muscarinic antagonist; SOC, System Organ Class.

**e-Figure 1. Distribution of propensity score among patients treated with LAMA/LABA versus LAMA/LABA/ICS**


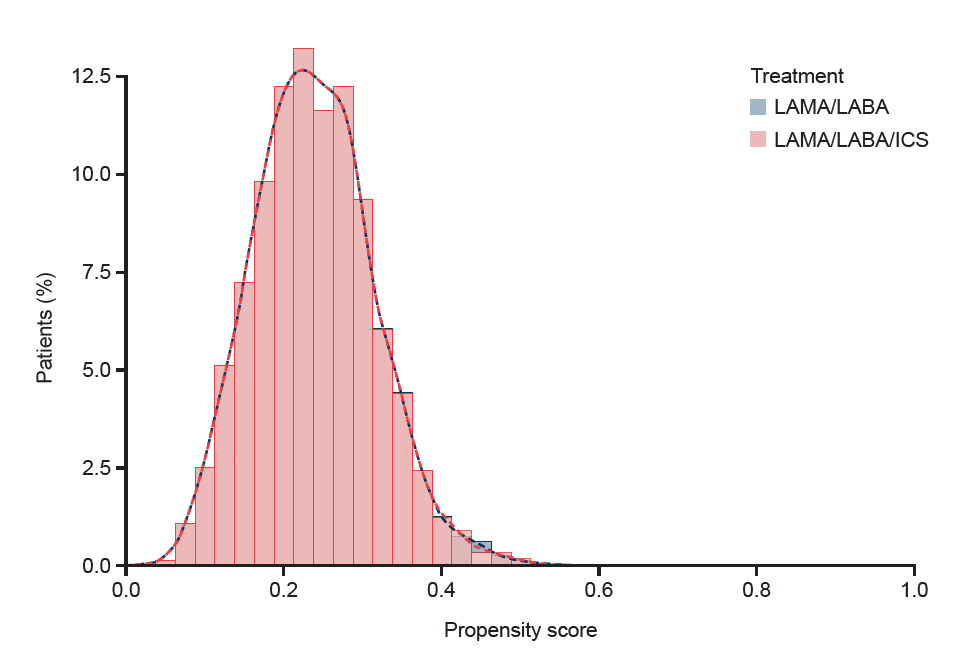


ICS, inhaled corticosteroid; LABA, long-acting β2-agonist; LAMA, long-acting muscarinic antagonist.

**e-Figure 2. Estimated probability of all-cause mortality over 52 weeks (ITT analysis)**


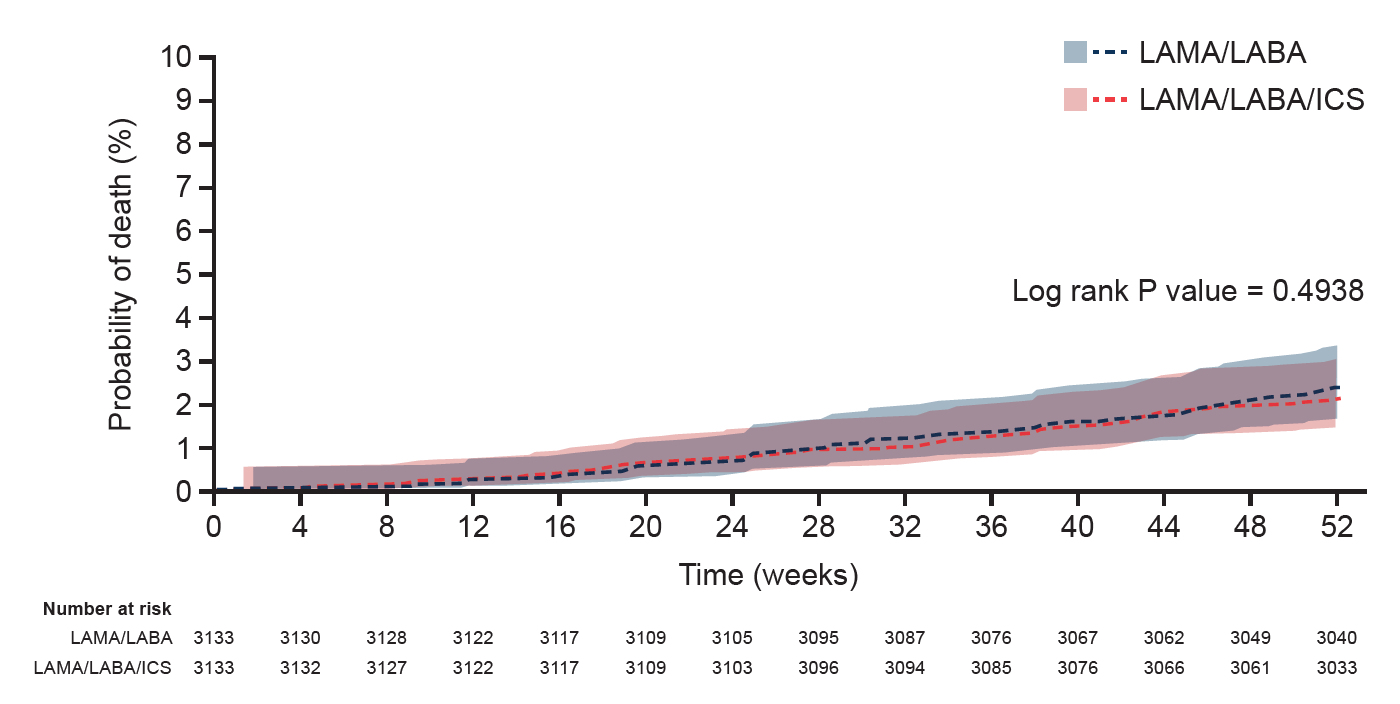


ICS, inhaled corticosteroid; ITT, intention-to-treat; LABA, long-acting β2-agonist; LAMA, long-acting muscarinic antagonist.
